# Supplementary material for: Highly air-stable, n-doped conjugated polymers achieved by dimeric organometallic dopants
Source: Royal Society of Chemistry journal article supplement (doi:10.1039/d0tc05931e), 2021-01-01
Supplement: d0tc05931e1.pdf [file d0tc05931e1.pdf]

Supplementary Materials for  
Highly air-stable, n-doped conjugated polymers achieved by dimeric  
organometallic dopants

Yu Yamashita\*, Samik Jhulki, Dinesh Bhardwaj, Elena Longhi,  
Shohei Kumagai, Shun Watanabe, Stephen Barlow\*, Seth R. Marder\*,  
Jun Takeya

Email: yu-yamashita@edu.k.u-tokyo.ac.jp

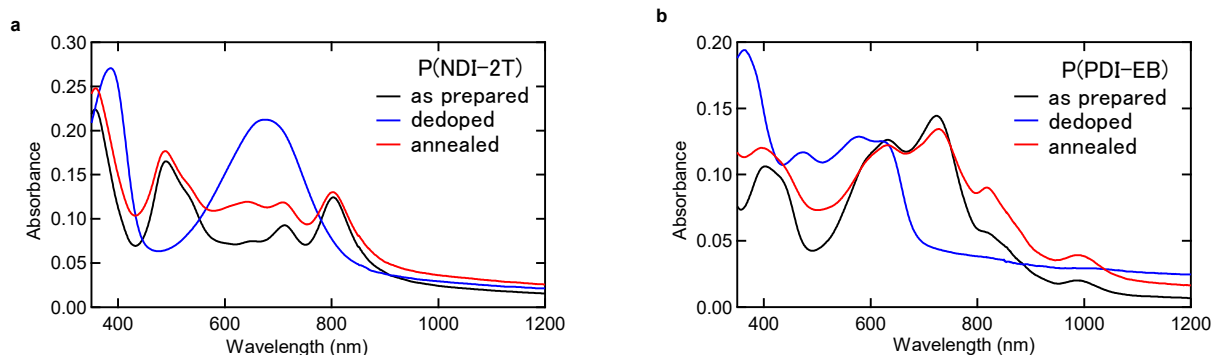

**Supplementary Figure S 1:** UV-Vis absorption spectra of (RuCp\*Mes)<sub>2</sub>-doped, dedoped and annealed samples for (a)P(NDI2OD-T2) and (b) P(PDI-EB) polymer thin films. In the dedoping process, samples were stored under temperature of 40 °C and humidity of 80 % for 10 minutes. In the annealing process, dedoped samples were heated at 180 °C in Ar atmosphere for 20 minutes. The observed small discrepancy between absorption spectra of the as doped and annealed state is expected to be reduced by further tuning process conditions.

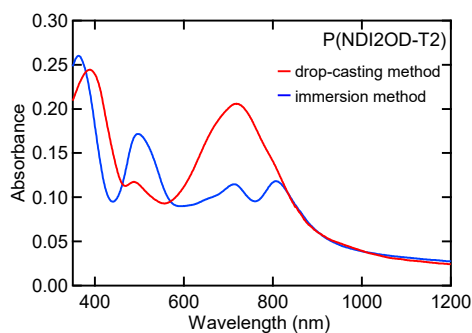

**Supplementary Figure S 2:** UV-Vis absorption spectrum of  $(\text{RuCp}^*\text{Mes})_2$ -doped P(NDI2OD-T2) thin film through the drop-casting method. The sample was encapsulated with CYTOP polymer film to prevent dedoping to the lower doped state that is observed in the immersion method. As a comparison, the spectrum of P(NDI2OD-T2) thin film doped through the immersion method is also presented which is measured without encapsulation.

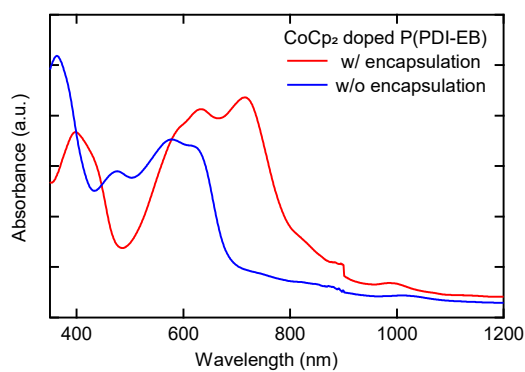

**Supplementary Figure S 3:** UV-Vis absorption spectra of P(PDI-EB) thin films doped with  $\text{CoCp}_2$  through the drop-casting method measured in air with and without encapsulation. Encapsulation was conducted in an Ar atmosphere by covering the thin film with CTL809M and a top glass substrate so that to sandwich the thin film with two glass substrates.

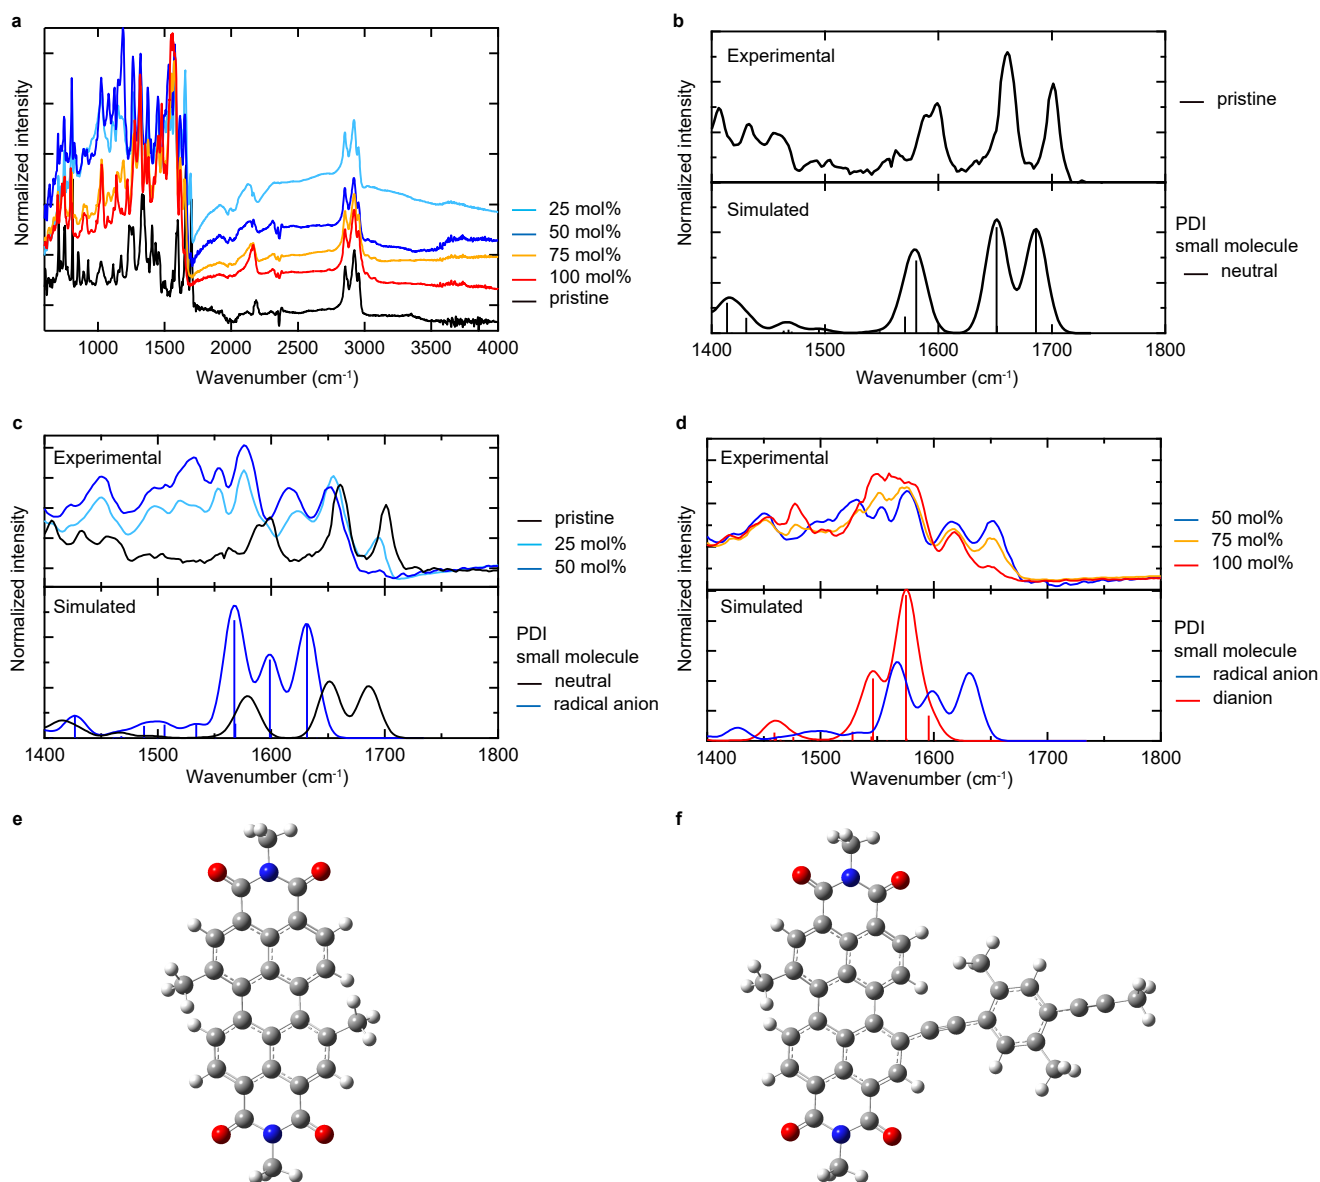

**Supplementary Figure S 4: FTIR spectra of P(PDI-EB) thin films fabricated from mixed solution with  $(\text{RuCp}^*\text{Mes})_2$ .** (a) FTIR spectra in a wide range and (b–d) ranges around the vibrational modes of carbonyl group. Upper panels are experimental spectra. Lower panels are simulated spectra for a PDI small molecule. Solid lines in the simulated spectra are the sum of all simulated peaks with a constant Gaussian broadening of  $10 \text{ cm}^{-1}$ . (e) The optimized structure of small molecular PDI. (f) The optimized structure of the model small molecule representing a monomer of P(PDI-EB) which was employed in our calculations. The inclusion of diethynylbenzene was necessary to reproduce some features of the spectra observed experimentally. Note that alkyl groups were replaced with a methyl group in order to reduce calculation costs.

**Supplementary Table 1:** Assignment of vibrational modes in neutral state

---

| frequency (cm <sup>-1</sup> ) | main mode                          | assignment in the main text |
|-------------------------------|------------------------------------|-----------------------------|
| 1568                          | ring stretching                    | –                           |
| 1573                          | ring stretching                    | v1                          |
| 1578                          | ring stretching                    | v1                          |
| 1587                          | ring stretching                    | –                           |
| 1591                          | ring stretching                    | –                           |
| 1650                          | C=O stretching (asymmetric in PDI) | v2                          |
| 1652                          | C=O stretching (asymmetric in PDI) | v2                          |
| 1685                          | C=O stretching (symmetric in PDI)  | v3                          |
| 1690                          | C=O stretching (symmetric in PDI)  | v3                          |

---

---

**Supplementary Table 2:** Assignment of vibrational modes in anion state

---

| frequency (cm <sup>-1</sup> ) | main mode                          | assignment in the main text |
|-------------------------------|------------------------------------|-----------------------------|
| 1533                          | ring stretching                    | –                           |
| 1547                          | ring stretching                    | –                           |
| 1560                          | ring stretching                    | v1                          |
| 1567                          | ring stretching                    | v1                          |
| 1586                          | ring stretching                    | –                           |
| 1604                          | C=O stretching (asymmetric in PDI) | v2                          |
| 1608                          | C=O stretching (asymmetric in PDI) | v2                          |
| 1637                          | C=O stretching (symmetric in PDI)  | v3                          |
| 1646                          | C=O stretching (symmetric in PDI)  | v3                          |

---

---

**Supplementary Table 3:** Assignment of vibration modes in dianion state

---

| frequency (cm <sup>-1</sup> ) | main mode                          | assignment in the main text |
|-------------------------------|------------------------------------|-----------------------------|
| 1528                          | ring stretching                    | –                           |
| 1540                          | ring stretching                    | –                           |
| 1557                          | C=O stretching (asymmetric in PDI) | v2                          |
| 1564                          | ring stretching                    | v1                          |
| 1568                          | C=O stretching (asymmetric in PDI) | v2                          |
| 1577                          | ring stretching                    | v1                          |
| 1583                          | ring stretching                    | –                           |
| 1604                          | C=O stretching (symmetric in PDI)  | v3                          |
| 1613                          | C=O stretching (symmetric in PDI)  | v3                          |

---

---
